# Supplementary material for: The Targeting of MRE11 or RAD51 Sensitizes Colorectal Cancer Stem Cells to CHK1 Inhibition
Source: MDPI journal article supplement (doi:10.3390/cancers13081957), 2021-04-19
Supplement: s1 [file s1]

## Supplementary Table S1. Raw data of the heatmap presented in Figure 1A

EXPERIMENT : Seinsitization to Prexasertib (100 nM)

ENDPOINT : Evaluation of % of viable cells by CellTiter Glo 72h upon treatment

NOTE : Number of independent experiments (n) =3

For each independent experiment, the results are normalized over untreated/control condition.

|               |                        |                           | Independent experiments |     |     | Mean |
|---------------|------------------------|---------------------------|-------------------------|-----|-----|------|
|               |                        |                           | 1                       | 2   | 3   |      |
| Target        | <b>RAD51</b>           | Untreated (NT)            | 100                     | 100 | 100 | 100  |
| Drug          | <b>B02</b>             | Prexasertib               | 92                      | 101 | 84  | 92   |
| Concentration | 10 $\mu$ M             | B02                       | 81                      | 72  | 76  | 76   |
|               |                        | Prexasertib + B02         | 50                      | 50  | 52  | 51   |
| Target        | <b>MRE11</b>           | NT                        | 100                     | 100 | 100 | 100  |
| Drug          | <b>Mirin</b>           | Prexasertib               | 93                      | 76  | 82  | 84   |
| Concentration | 25 $\mu$ M             | Mirin                     | 92                      | 93  | 67  | 84   |
|               |                        | Prexasertib + Mirin       | 74                      | 59  | 42  | 58   |
| Target        | <b>Topoisomerase I</b> | NT                        | 100                     | 100 | 100 | 100  |
| Drug          | <b>Irinotecan</b>      | Prexasertib               | 102                     | 94  | 102 | 100  |
| Concentration | 1 $\mu$ M              | Irinotecan                | 94                      | 84  | 95  | 91   |
|               |                        | Prexasertib + Irinotecan  | 65                      | 67  | 79  | 70   |
| Target        | <b>WEE1</b>            | NT                        | 100                     | 100 | 100 | 100  |
| Drug          | <b>Adavosertib</b>     | Prexasertib               | 87                      | 79  | 97  | 88   |
| Concentration | 100 nM                 | Adavosertib               | 77                      | 70  | 102 | 83   |
|               |                        | Prexasertib + Adavosertib | 37                      | 25  | 40  | 34   |
| Target        | <b>RRM2</b>            | NT                        | 100                     | 100 | 100 | 100  |
| Drug          | <b>Triapine</b>        | Prexasertib               | 88                      | 89  | 94  | 91   |
| Concentration | 200 nM                 | Triapine                  | 101                     | 89  | 116 | 102  |
|               |                        | Prexasertib + Triapine    | 30                      | 27  | 19  | 25   |
| Target        | <b>ATR</b>             | NT                        | 100                     | 100 | 100 | 100  |
| Drug          | <b>VE-821</b>          | Prexasertib               | 79                      | 85  | 96  | 87   |
| Concentration | 15 $\mu$ M             | VE-821                    | 68                      | 75  | 84  | 76   |
|               |                        | Prexasertib + VE-821      | 60                      | 75  | 80  | 72   |
| Target        | <b>DNA-PK</b>          | NT                        | 100                     | 100 | 100 | 100  |
| Drug          | <b>NU7026</b>          | Prexasertib               | 85                      | 86  | 87  | 86   |
| Concentration | 50 $\mu$ M             | NU7026                    | 88                      | 88  | 94  | 90   |
|               |                        | Prexasertib + NU7026      | 81                      | 79  | 86  | 82   |
| Target        | <b>ATM</b>             | NT                        | 100                     | 100 | 100 | 100  |
| Drug          | <b>KU-60019</b>        | Prexasertib               | 87                      | 89  | 83  | 86   |
| Concentration | 5 $\mu$ M              | KU-60019                  | 78                      | 91  | 86  | 85   |
|               |                        | Prexasertib + KU-60019    | 76                      | 78  | 77  | 77   |
