# Supplementary material for: The Targeting of MRE11 or RAD51 Sensitizes Colorectal Cancer Stem Cells to CHK1 Inhibition
Source: Cancers (Basel). 2021 Apr 19;13(8):1957. doi: 10.3390/cancers13081957 (PMC8073980; doi:10.3390/cancers13081957)
Supplement: Supplementary file 1 [file cancers-13-01957-s001.zip]

Archive with 15 entries (15 files):
- Movie S1 Mattiello et al.avi
- Movie S10 Mattiello et al.avi
- Movie S11 Mattiello et al.avi
- Movie S12 Mattiello et al.avi
- Movie S2 Mattiello et al.avi
- Movie S3 Mattiello et al.avi
- Movie S4 Mattiello et al.avi
- Movie S5 Mattiello et al.avi
- Movie S6 Mattiello et al.avi
- Movie S7 Mattiello et al.avi
- Movie S8 Mattiello et al.avi
- Movie S9 Mattiello et al.avi
- Supplementary Figures_Mattiello et al.pdf
- Supplementary information Mattiello et al.pdf
- Supplementary Table 1 Mattiello et al.pdf
