# Supplementary figures and images for: The Targeting of MRE11 or RAD51 Sensitizes Colorectal Cancer Stem Cells to CHK1 Inhibition
Source: MDPI journal article supplement (doi:10.3390/cancers13081957), 2021-04-19

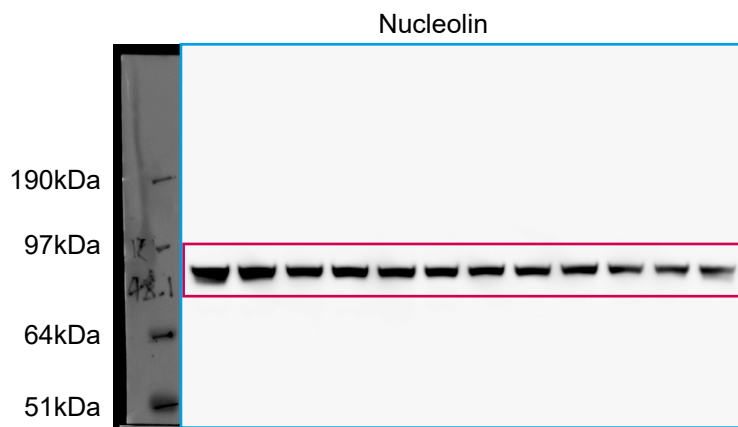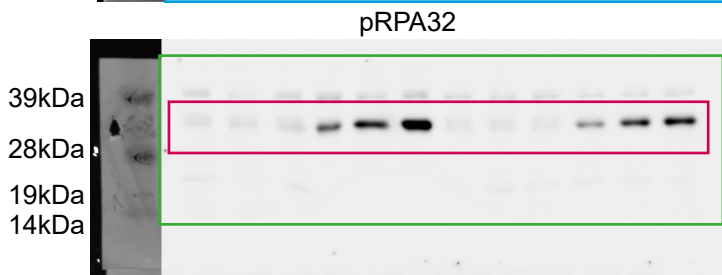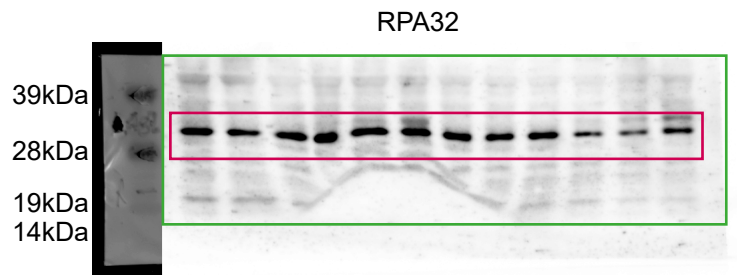

**FIGURE S1**

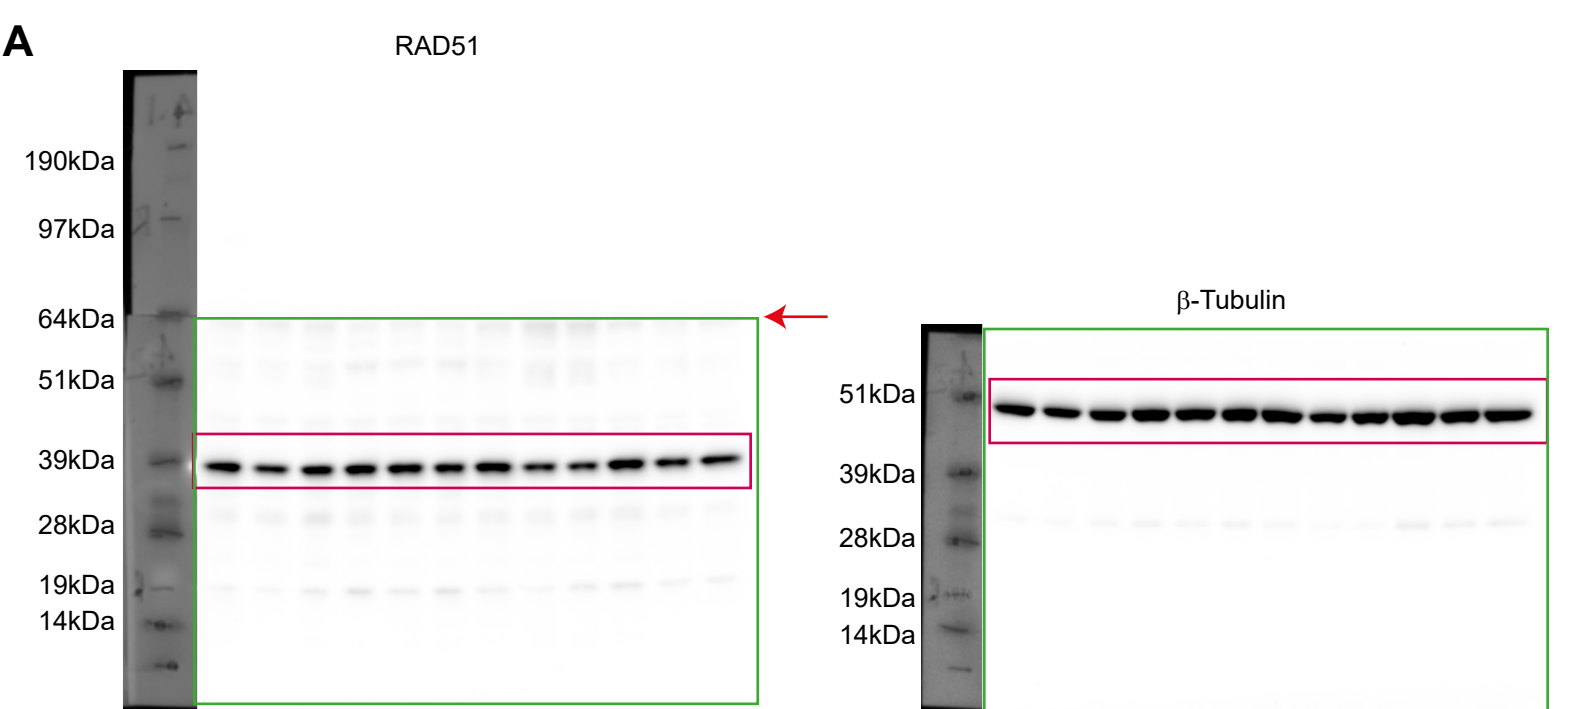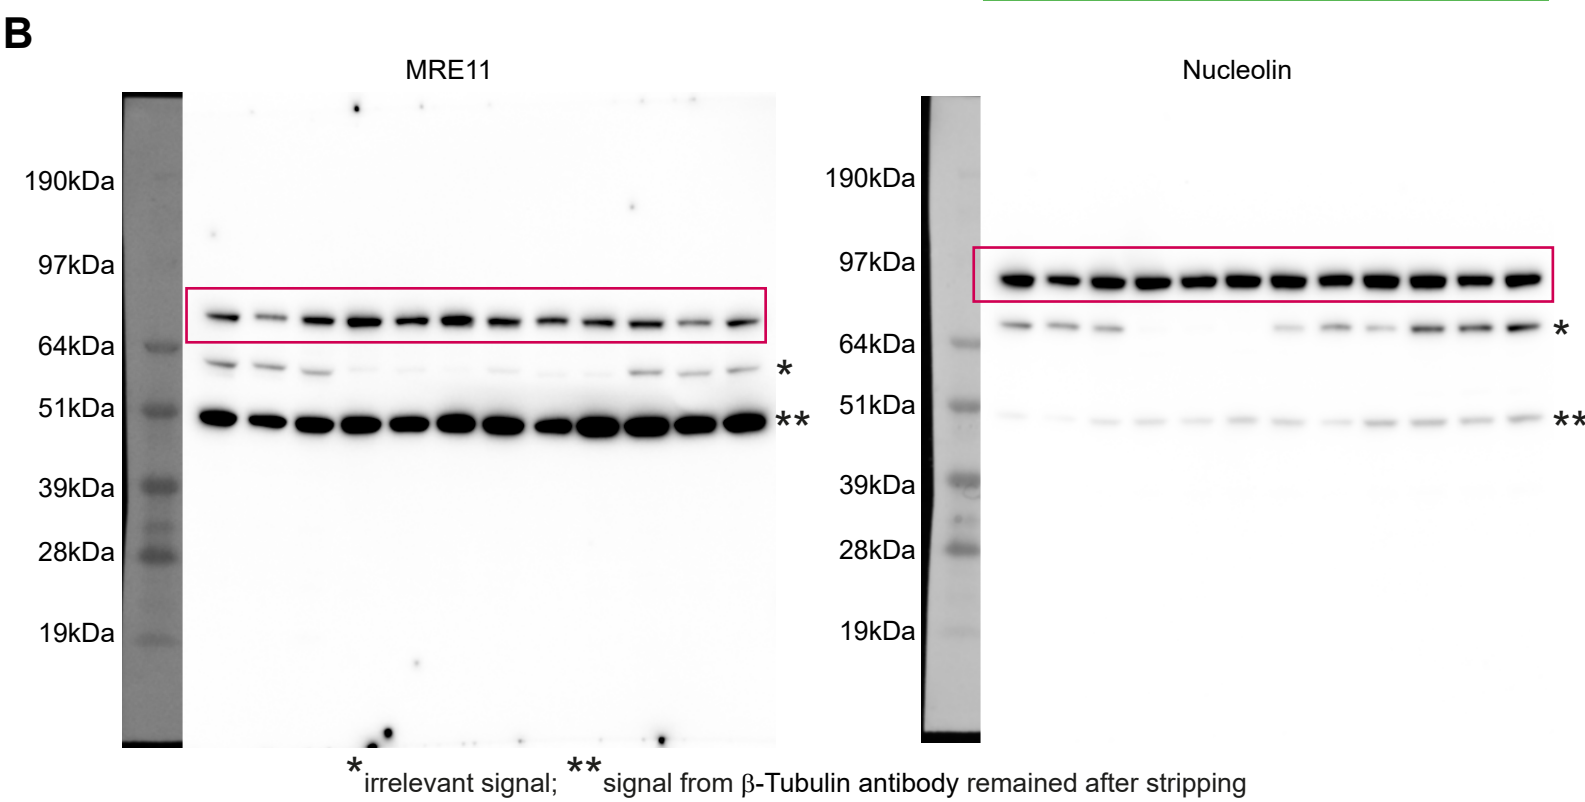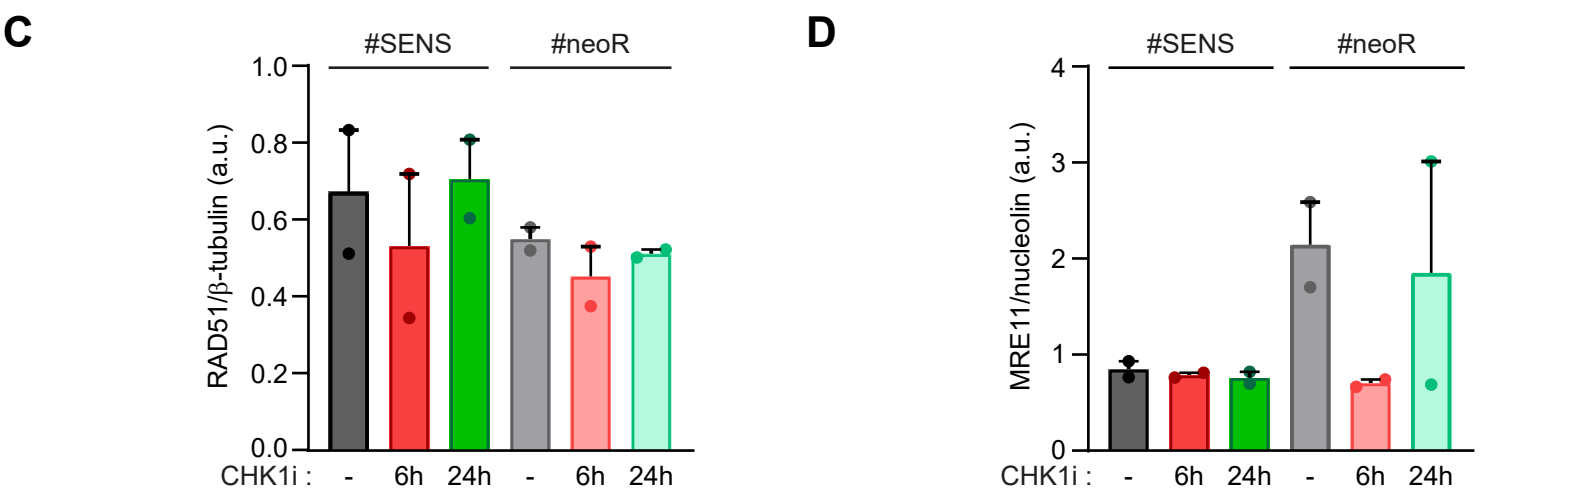

**FIGURE S2**

**A**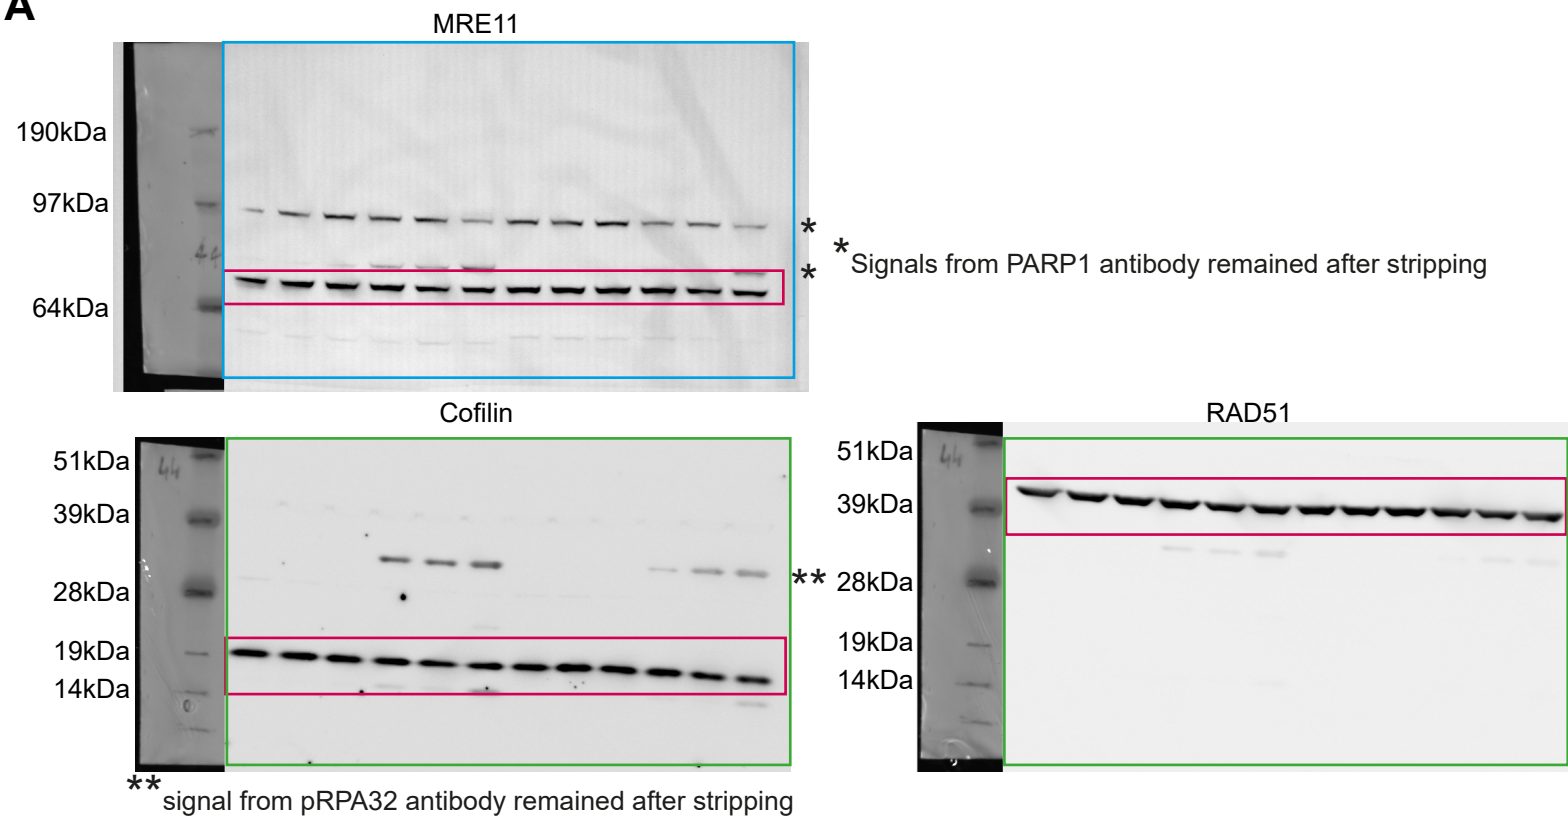**B**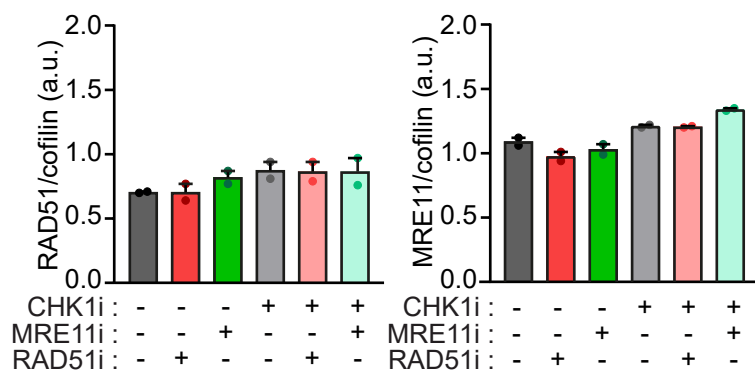**FIGURE S3**

PARP1 (up) and cPARP1 (down)

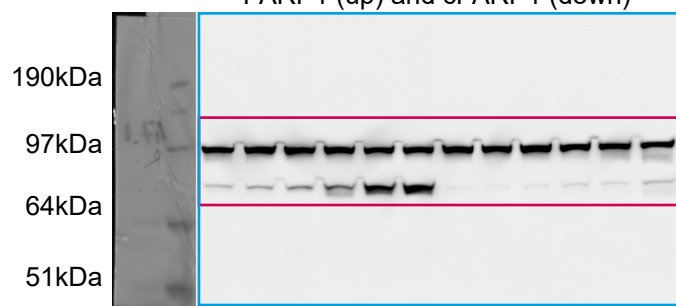

$\beta$ -Actin

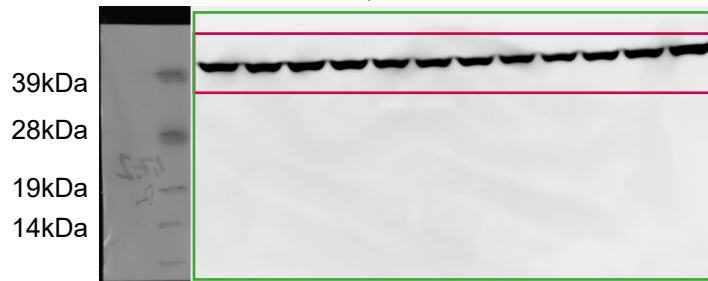

**FIGURE S4**



**A**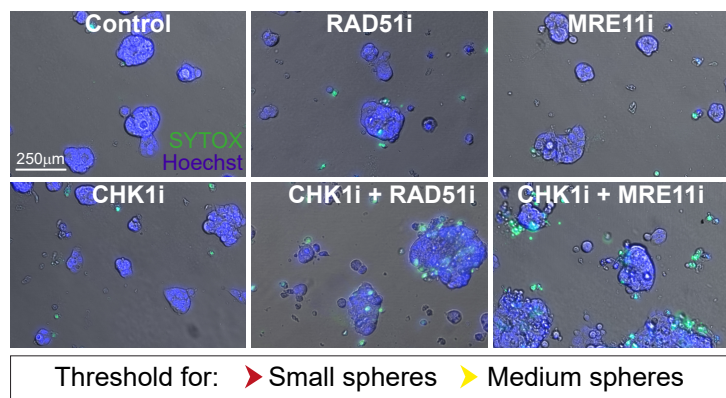**B**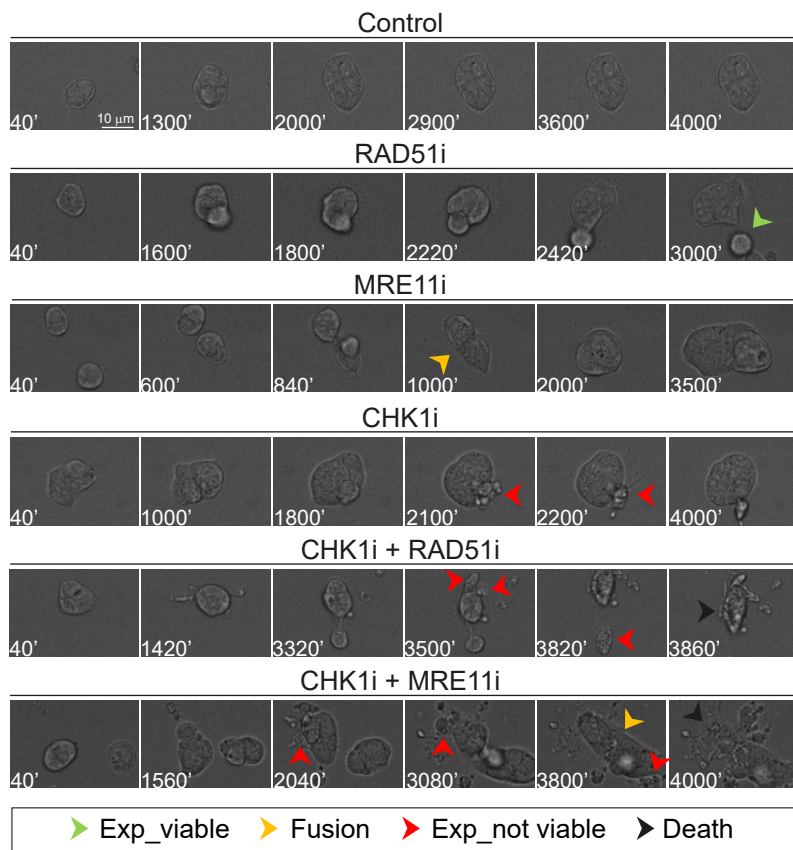**FIGURE S5**

Supplement: s1 [file s1]
